# Supplementary material
Source: Springer Nature journal article supplement (https://www.springermedizin.de/resource/supplementary/12939_2013_460_MOESM1_ESM.pdf/9551214)

Odds Ratio and 95% CI

1.2  
0.8  
0.4  
0.0

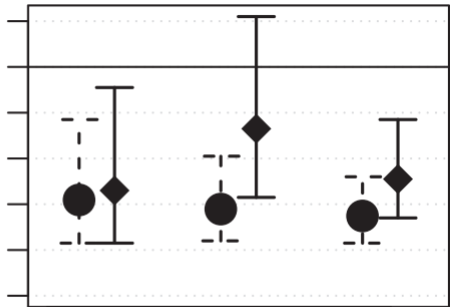

St. Petersburg

Estonia

Finland

Supplement: MOESM1 [file 9551214]
